# Supplementary figures and images for: Measurement of the effective electric field radius on digital ion trap spectrometer
Source: Royal Society of Chemistry journal article supplement (doi:10.1039/d1an00468a), 2021-01-01

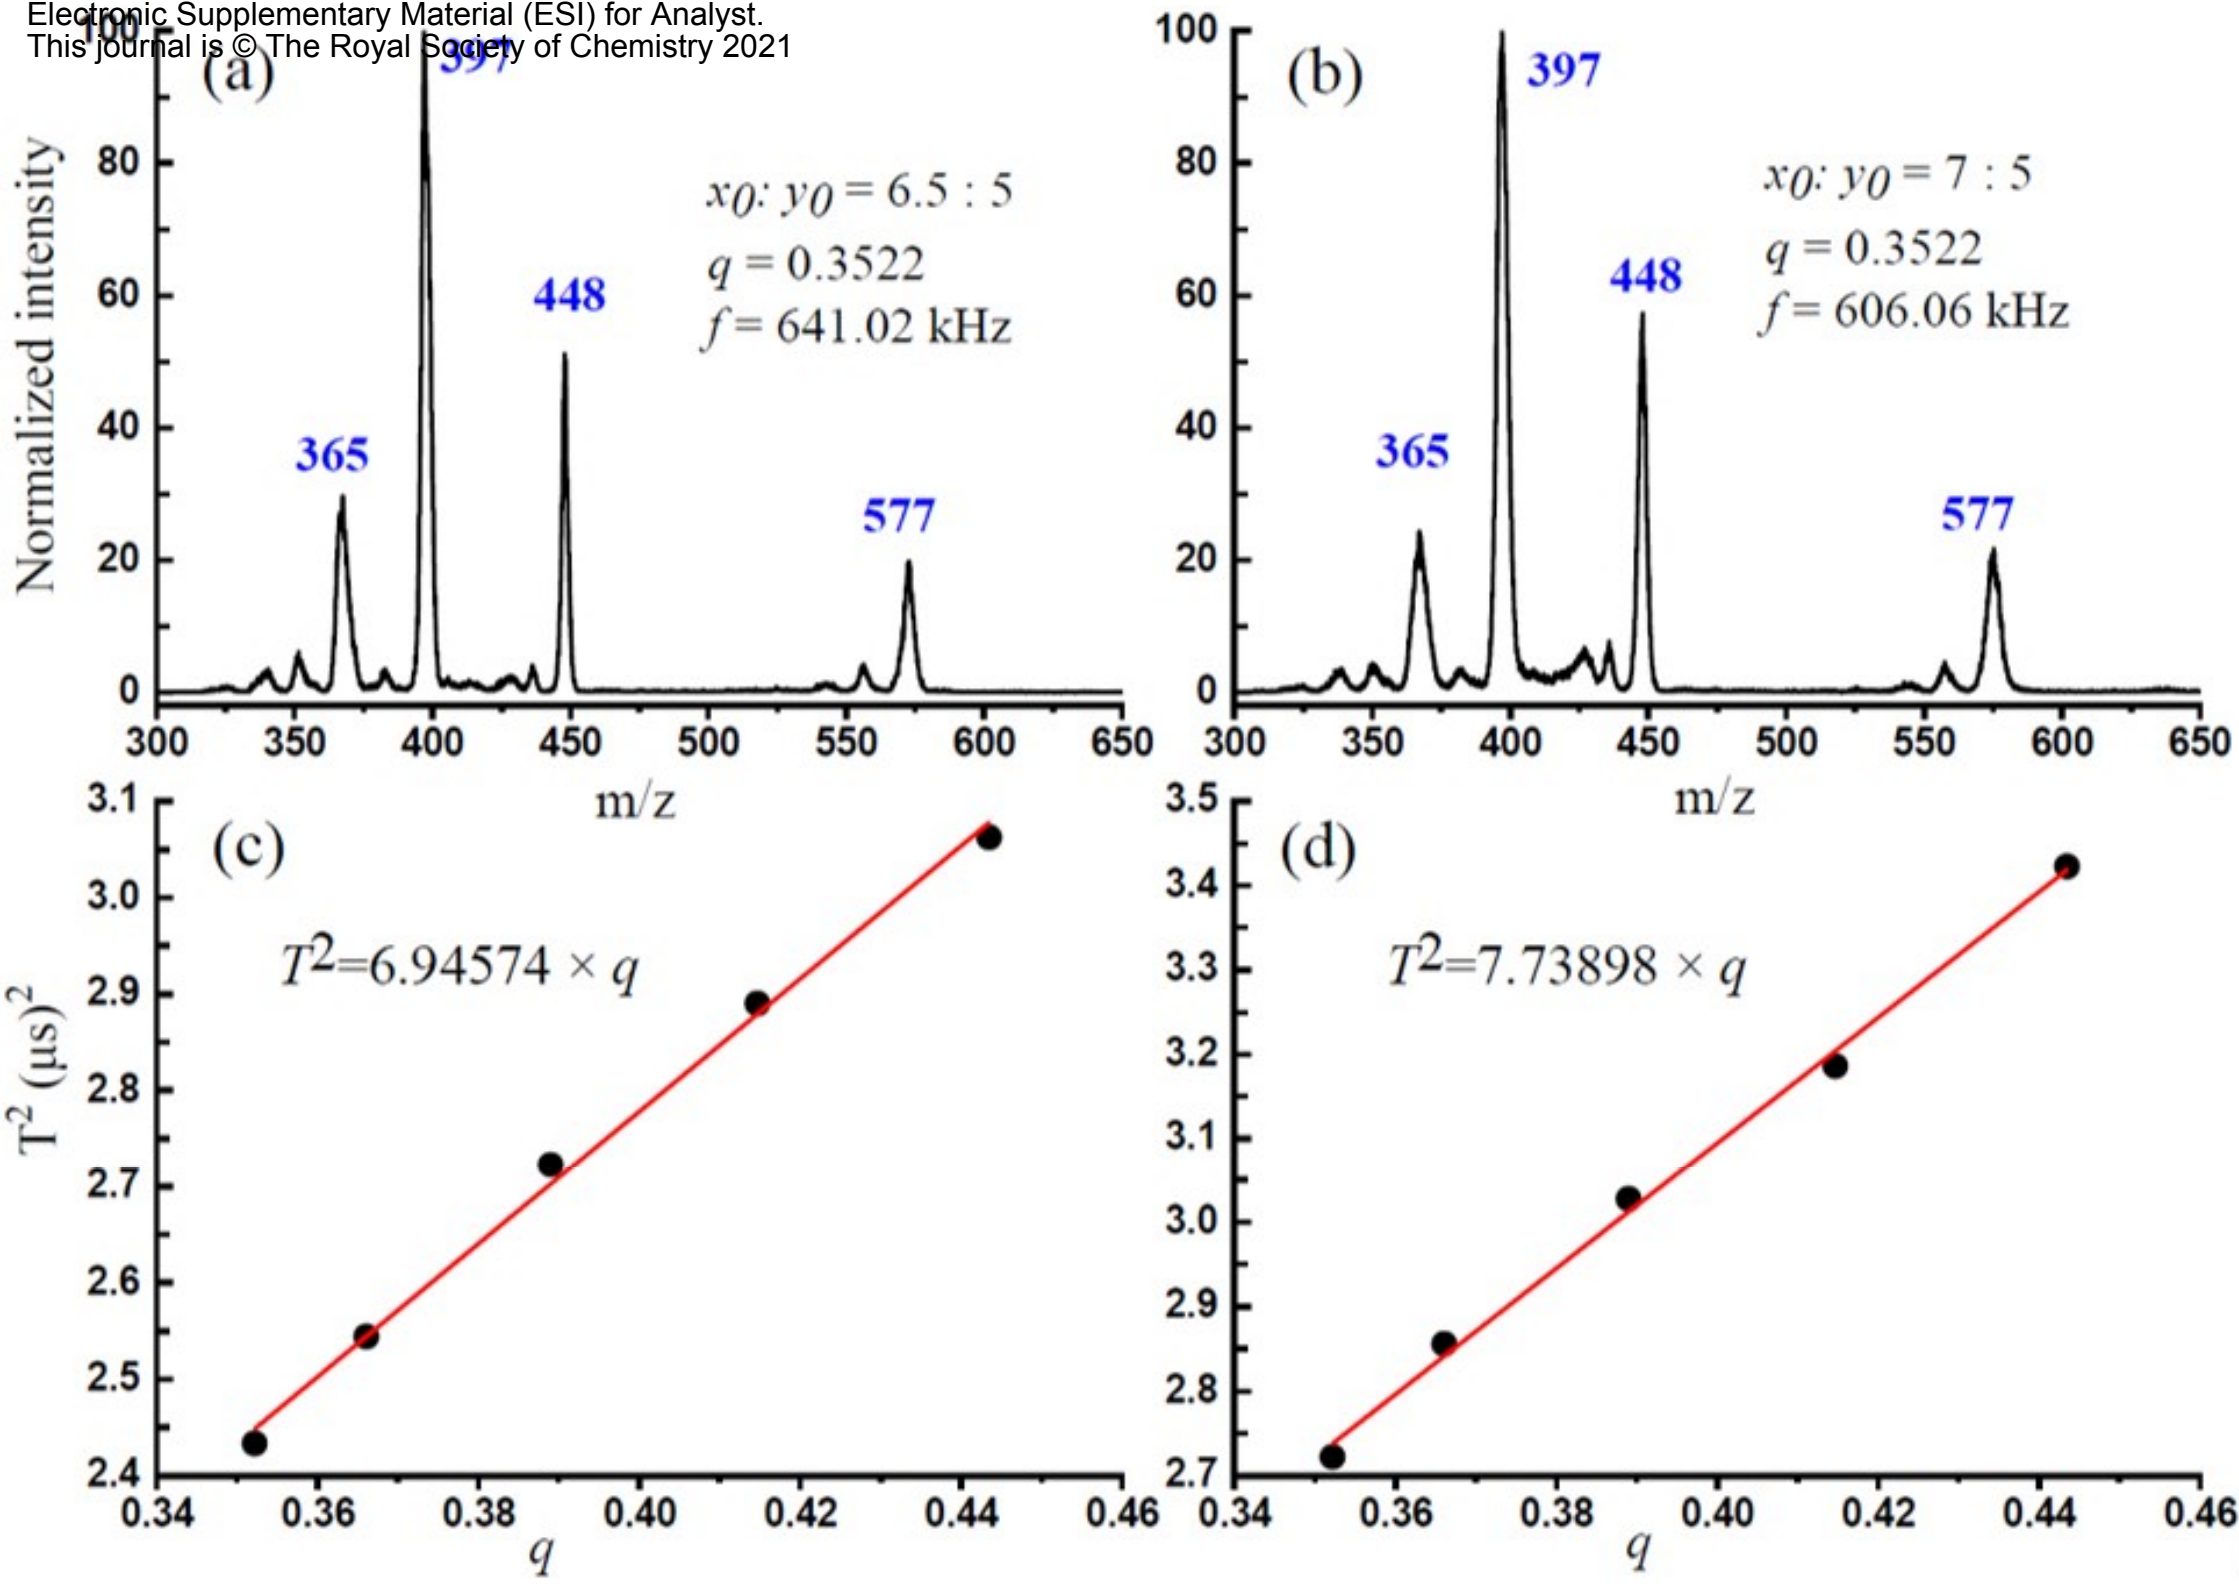

Supplement: d1an00468a2.pdf [file d1an00468a2.pdf]

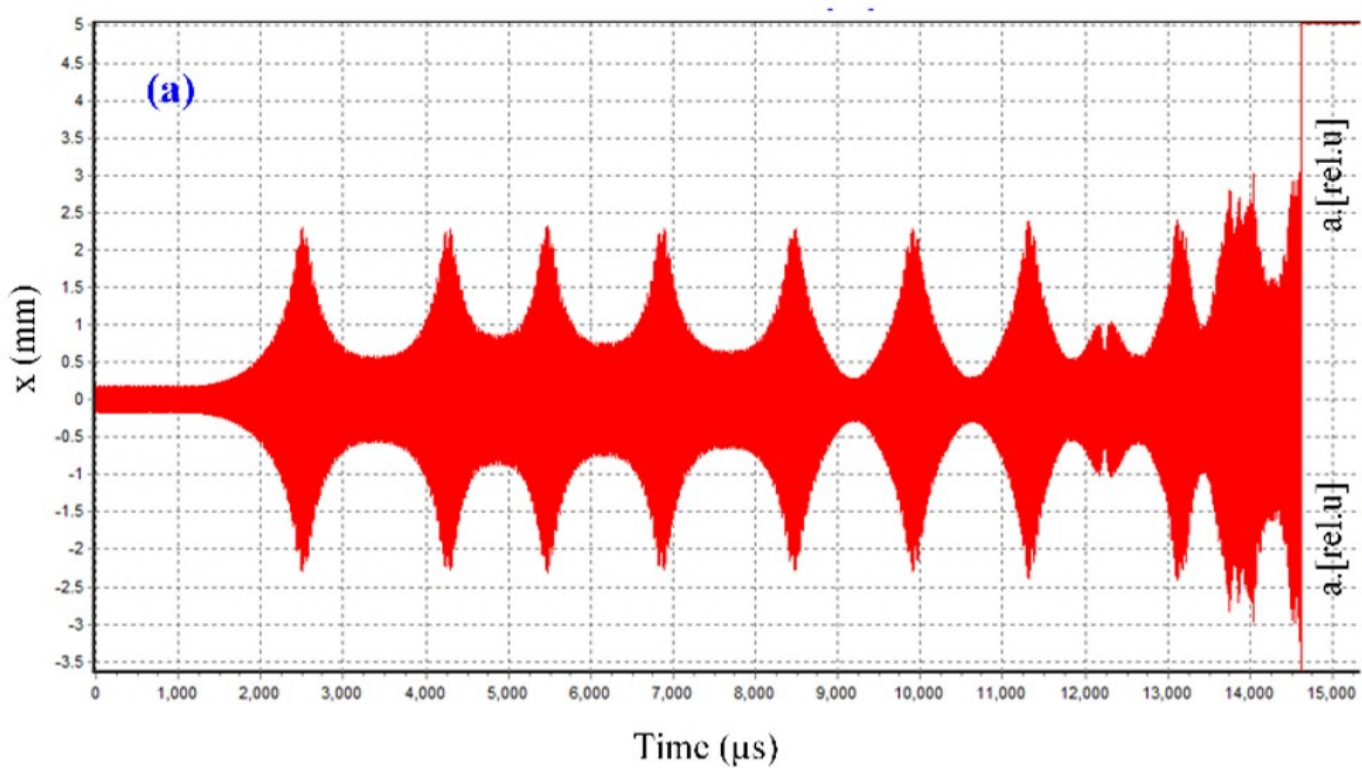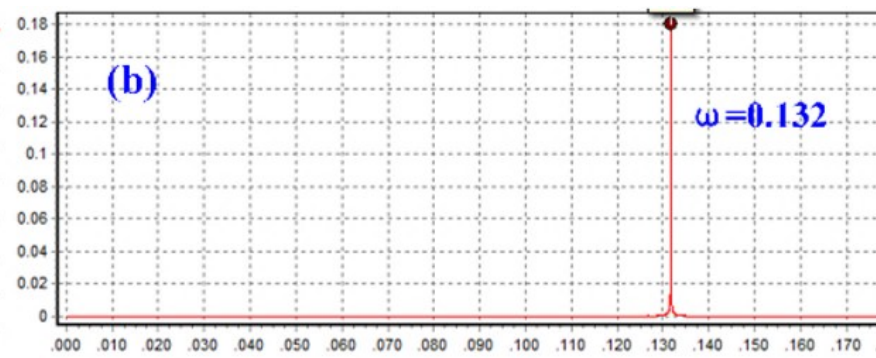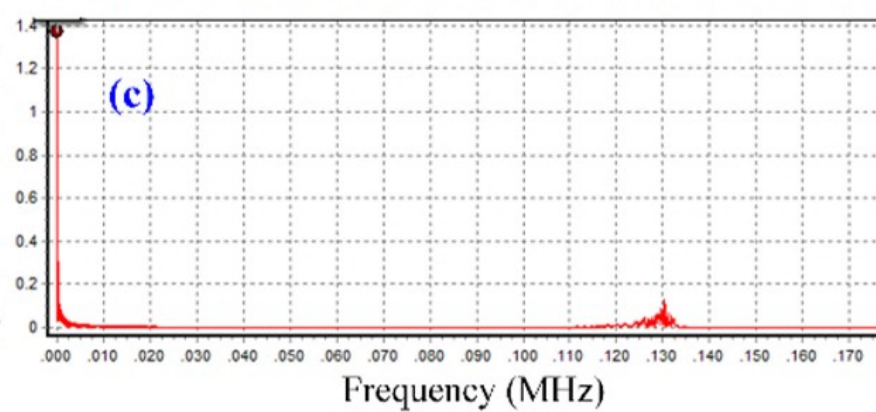

Supplement: d1an00468a4.pdf [file d1an00468a4.pdf]
